# Supplementary material for: One-pot solvent-free synthesis of sodium benzoate from the oxidation of benzyl alcohol over novel efficient AuAg/TiO2 catalysts
Source: Royal Society of Chemistry journal article supplement (doi:10.1039/c1gc15311k), 2011-01-01
Supplement: c1gc15311k.pdf [file c1gc15311k.pdf]

## *Electronic Supplementary Information*

# **One-pot Solvent-free Synthesis of Sodium Benzoate from the Oxidation of Benzyl Alcohol over Novel Efficient AuAg/TiO<sub>2</sub> Catalysts**

Ying Wang, Jia-Min Zheng, Kangnian Fan, and Wei-Lin Dai\*

*Department of Chemistry & Shanghai Key Laboratory of Molecular Catalysis and Innovative Material, Fudan University, Shanghai 200433, P. R. China. Fax: (+86-21) 55665572; Tel: (+86-21) 55664678; E-mail: [wldai@fudan.edu.cn](mailto:wldai@fudan.edu.cn)*

### **Catalyst Preparation**

Monometallic Au/TiO<sub>2</sub> (commercial Degussa P25) catalysts were prepared by deposition-precipitation method. HAuCl<sub>4</sub>·3H<sub>2</sub>O was dissolved in 100 mL of deionized water (24.3 mmol/L). Urea was used as precipitation agent, with a gold/urea molar ratio of 1/200. Then 0.6 g of TiO<sub>2</sub>, 10 mL of HAuCl<sub>4</sub>, 2.92 g of urea and 48 mL of H<sub>2</sub>O was added. The mixture was stirred for 2 h at 80°C, during which the pH value gradually increased from 3 to 8. The as-received precipitate was collected by filtration, washed three times with deionized water, and dried in air overnight at 100°C, followed by calcining in air for 4 h at 300°C.

Monometallic Ag/TiO<sub>2</sub> catalysts were prepared by a wet impregnation method. 1.0 g of TiO<sub>2</sub> was added to mixture of 8.5 mL of AgNO<sub>3</sub> (aqueous solution, 47.6 mmol/L) and 85 mL of H<sub>2</sub>O, and then the resulting slurry was vigorously stirred at 60°C under atmospheric pressure until the complete evaporation of water. The solid materials were dried at 100°C, followed by calcining in air for 4 h at 500°C.

AuAg/TiO<sub>2</sub> catalysts were synthesized as following. Firstly, Ag/TiO<sub>2</sub> was prepared by impregnation method; then AuAg/TiO<sub>2</sub> was prepared by homogeneous deposition-precipitation method with Ag/TiO<sub>2</sub> as the support. The total metal loading was controlled as 8 wt.%. For the recycling test, the used catalyst was washed with dilute HCl aqueous solution three times, then calcined at 300°C in a muffle oven for 4 h.

## Catalyst Characterization

The XRD patterns were recorded on a Bruker D8 advance spectrometer with Cu K $\alpha$  radiation ( $\lambda = 0.154$  nm), operated at 40 mA and 40 kV. The XPS spectra were recorded under vacuum ( $<10^{-6}$  Pa) at a pass energy of 93.90 eV on a Perkin-Elmer PHI 5000C ESCA system equipped with a dual X-ray source using an Mg K $\alpha$  (1253.6 eV) anode and a hemi-spheric energy analyzer. All binding energies were calibrated using contaminant carbon (C 1s = 284.6 eV) as a reference. TEM micrographs were obtained on a JOEL JEM 2010 transmission electron microscope. The UV–Vis. DRS spectra were collected using a Shimadzu UV-2450 spectrophotometer from 200 to 800 nm using BaSO<sub>4</sub> as the background. The gold loadings were determined by the inductively coupled plasma (ICP) method. The <sup>1</sup>H NMR spectrum of the as-prepared product was recorded on a DMX 500. FT-IR spectra were taken on a Nicolet-NEXUS 470 FT-IR spectroscopy.

## Activity Measurements

All the experiments were carried out in a magnetically stirred glass flask provided under reflux and a mercury thermometer. Reaction temperature of oil bath was maintained at 200°C. A pre-determined quantity of benzyl alcohol (1.08 g) was added in the reactor, and then AuAg/TiO<sub>2</sub> (0.1 g) and NaOH (0.5 g) was added at atmospheric pressure. This reaction was carried out under solvent-free condition and was maintained at a fixed temperature (200°C) with the stirring rate of 800 rpm for 10 h. After that 12 ml of H<sub>2</sub>O was added, and the reaction mixture was centrifuged to remove the solid catalyst. The filtrate was evaporated and crystallined. White solid of sodium benzoate was obtained with purity >99%. In addition, after acidification by HCl aqueous solution until the pH value was gradually decreased to 2.0, the mixture was filtered and then white solid of benzoic acid was obtained with purity >99%. It should be mentioned that, after 10 hours, there was no liquid drop dripped, meaning the benzyl alcohol was completely transformed. Thus, the conversion of benzyl alcohol is 100% and the selectivity is the same as the yield.

The white solid was dried in air, and then weighed.

$$\text{Yield\%} = [\text{n}(\text{benzoic acid})/\text{n}(\text{benzyl alcohol})] * 100\%$$

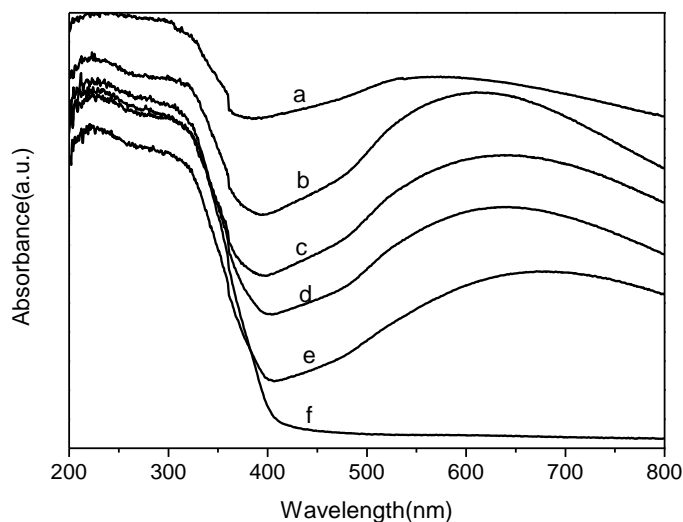

Figure S1 UV-Vis. DRS spectra of AuAg/TiO<sub>2</sub> with different Au/Ag molar ratios: (a)4/0, (b)3/1, (c)2/2, (d)1/3, (e)0.5/3.5, (f)0/4.

Fig. S1 shows the UV-Vis. DRS spectra of AuAg/TiO<sub>2</sub> with different Au/Ag molar ratios. Au-Ag bimetallic catalysts show the absorption peaks due to their surface plasma resonance band. For the monometallic Au/TiO<sub>2</sub>, absorption bands with maxima were observed at 525 nm. All Au-Ag bimetallic catalysts show absorption peaks with a red shift compared to the monometallic Au one, and the absorption peaks shift to the higher end with an decrease in Au/Ag molar ratios.

Fig. S2 shows Au 4f<sub>7/2</sub> and Au 4f<sub>5/2</sub> of XPS spectra in AuAg/ TiO<sub>2</sub> with different Au/Ag molar ratios. In monometallic Au/TiO<sub>2</sub>, the gold exists in the metallic state. In bimetal catalyst there is a negative shift for the Au 4f BE, which suggests that a negative charge is deposited on Au clusters. Fig. S3 shows Ag 3d<sub>5/2</sub> and 3d<sub>3/2</sub> XPS spectra in AuAg/ TiO<sub>2</sub> with different Au/Ag molar ratios. In monometallic Ag/TiO<sub>2</sub>, the silver exists also in the metallic state. In the bimetallic catalysts there is a also negative shift of the Ag 3d<sub>5/2</sub> BE, which suggests that a positive charge is deposited on Ag clusters because the BE of Ag 3d<sub>5/2</sub> shifts negatively if the silver was positively charged. Table S1 lists the surface composition and bulk composition of those catalysts.

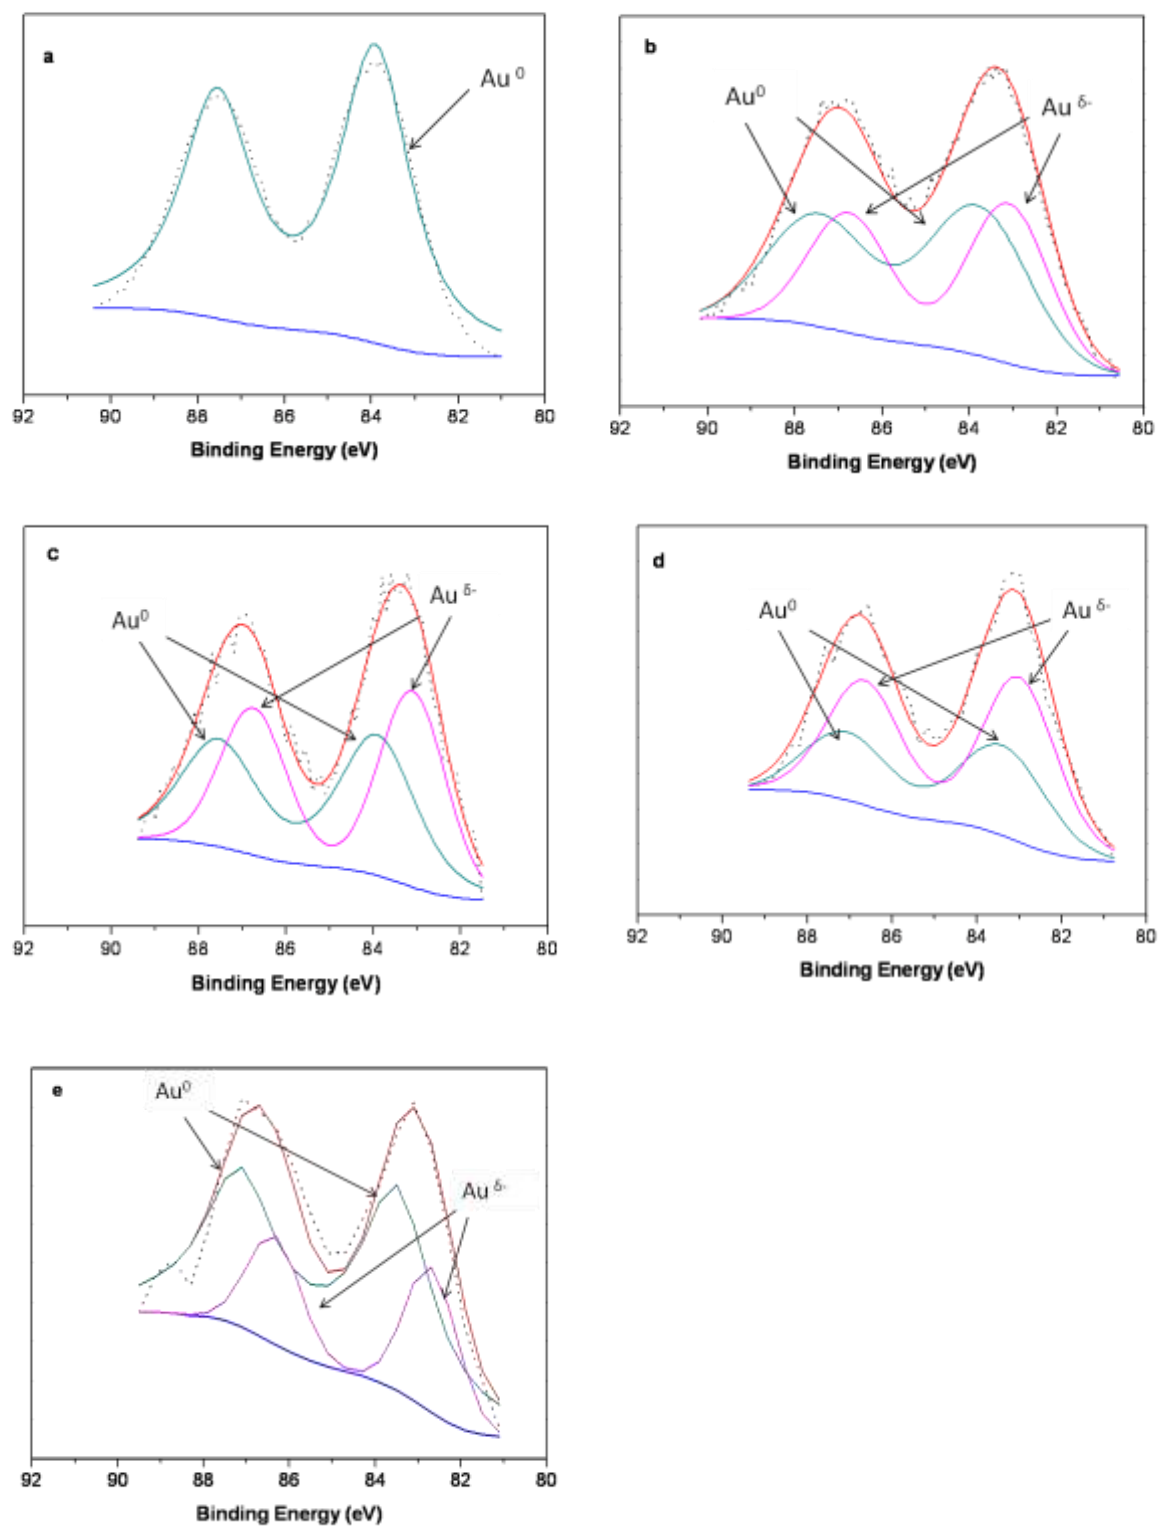

Figure S2. Au4f<sub>7/2</sub> and Au4f<sub>5/2</sub> XPS spectra in AuAg/TiO<sub>2</sub> with different Au/Ag molar ratios: (a)4/0; (b)3/1; (c)2/2; (d)1/3; (e)0.5/3.5.

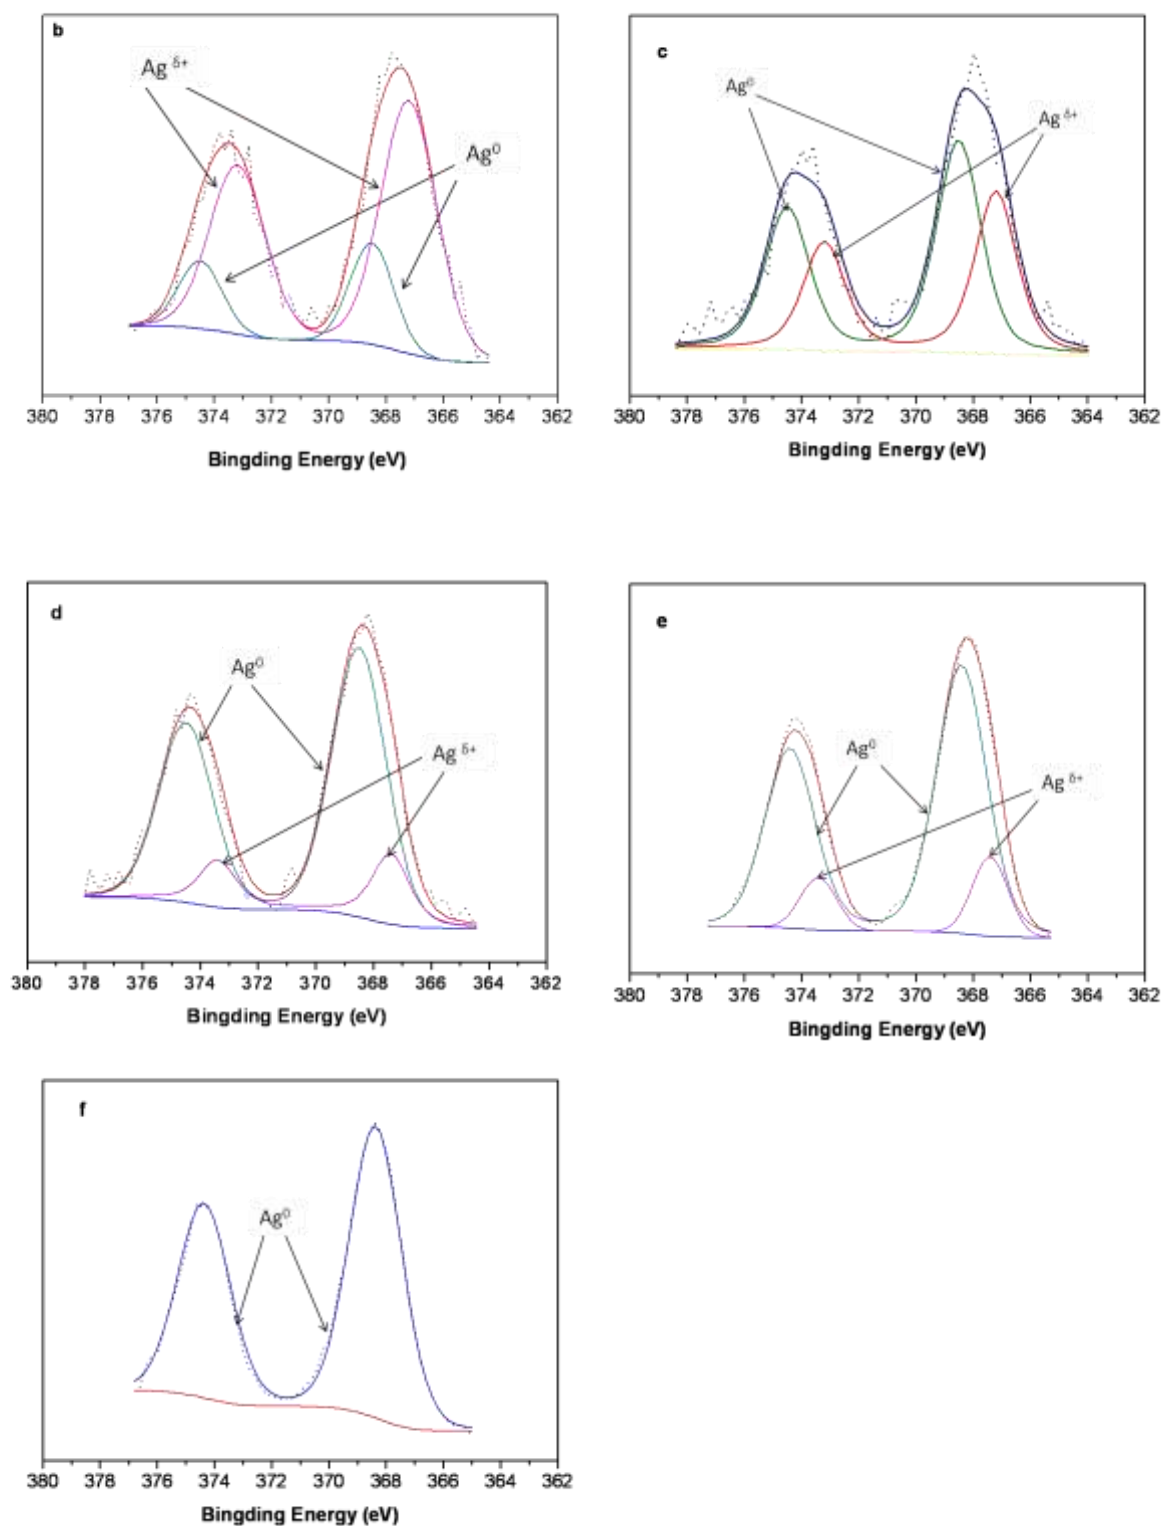

Figure S3. Ag3d 5/2 and 3d3/2 XPS spectra in AuAg/TiO<sub>2</sub> with different Au/Ag molar ratios: (b)3/1; (c)2/2; (d)1/3; (e)0.5/3.5;(f) 0/4.

Table S1. Surface composition and bulk composition of catalyst

| Au/Ag<br>(nominal) | Au/Ag<br>(molar) <sup>a</sup> | Au <sup>0</sup> /Au <sup>δ-</sup><br>(molar) <sup>a</sup> | Ag <sup>0</sup> /Ag <sup>δ+</sup><br>(molar) <sup>a</sup> | Au/Ag<br>(molar) <sup>b</sup> |
|--------------------|-------------------------------|-----------------------------------------------------------|-----------------------------------------------------------|-------------------------------|
| 4/0                | ∞                             | ∞                                                         | -                                                         | ∞                             |
| 3/1                | 2.5                           | 1.0                                                       | 0.3                                                       | 3.4                           |
| 2/2                | 2.0                           | 0.95                                                      | 1.3                                                       | 1.2                           |
| 1/3                | 0.50                          | 0.60                                                      | 4.5                                                       | 0.36                          |
| 0/4                | 0                             | -                                                         | ∞                                                         | 0                             |

a, Determined by ICP;

b, Determined by XPS.

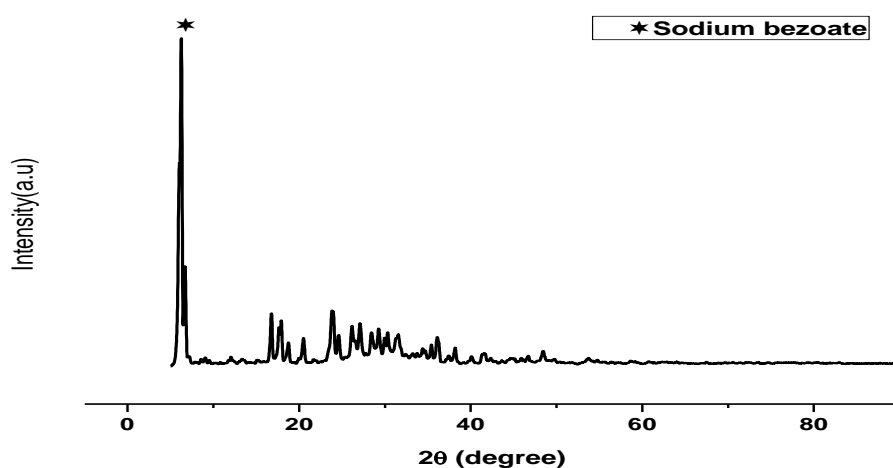

Figure S4 XRD pattern of the product sodium benzoate

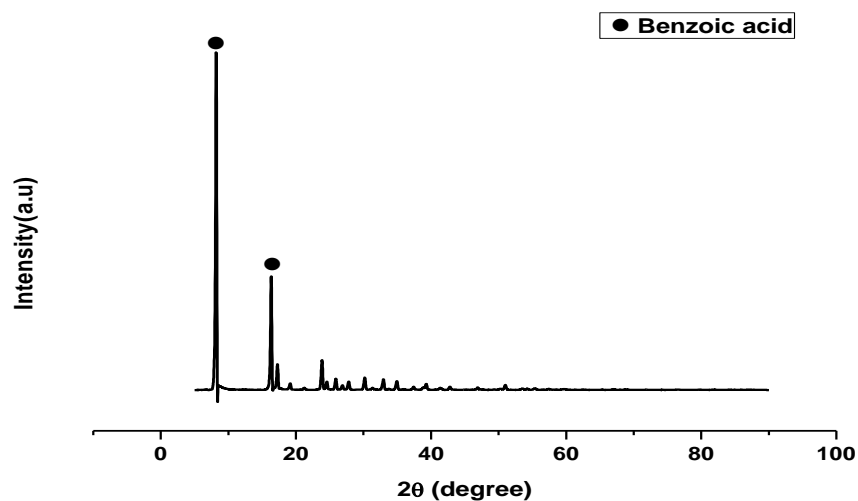

Figure S5 XRD pattern of the product benzoic acid

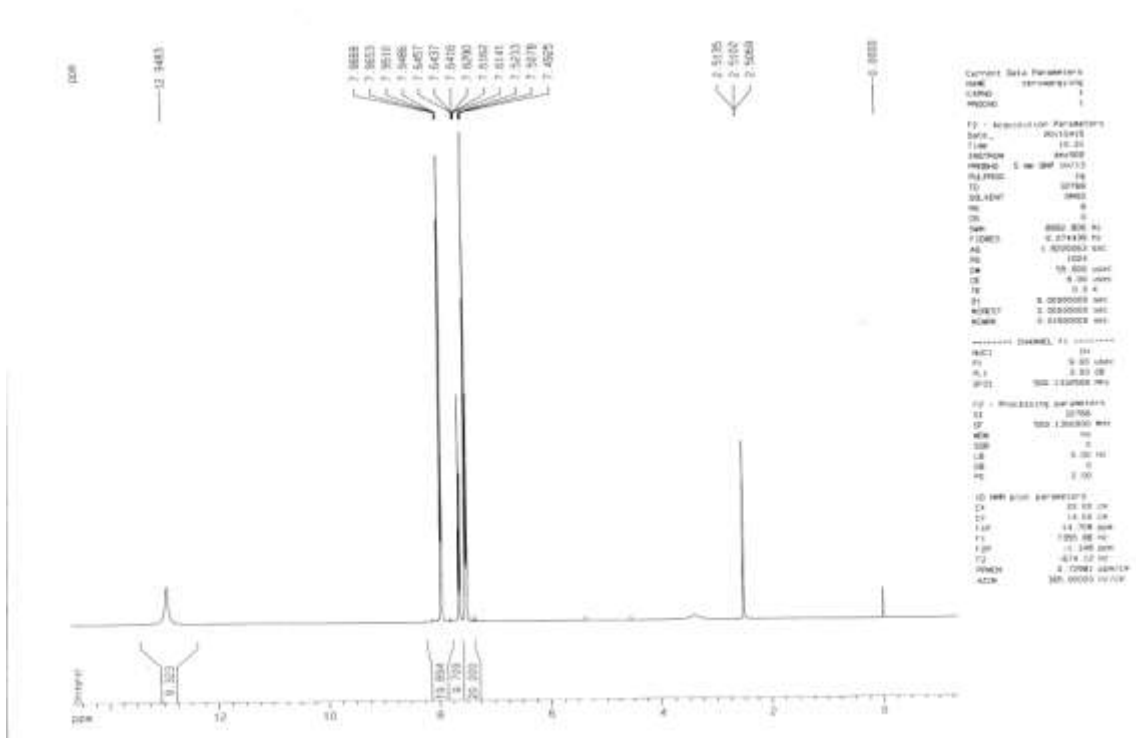

Figure S6 The <sup>1</sup>H NMR spectrum of benzoic acid

Table S2 <sup>1</sup>H NMR results

| Sample       | $\delta$ 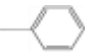 | $\delta$ 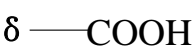 |
|--------------|----------------------------------------------------------------------------------------------|------------------------------------------------------------------------------------------------|
| benzoic acid | 7.9668~7.4925 ppm                                                                            | 12.9483 ppm                                                                                    |

Table S3 FT-IR bands of benzoic acid

| wave number (cm <sup>-1</sup> ) | functional groups                    |
|---------------------------------|--------------------------------------|
| 3103, 3087                      | =C-H stretching vibration            |
| 1588, 1571, 1519, 1494          | stretching vibration of benzene ring |
| 925, 831, 745, 708, 631         | C-H bend vibration                   |
| 3000~2500 (multiple peak )      | O-H                                  |
| 935                             | O-H                                  |
| 1400                            | C=O                                  |
| 1250                            | C-O-H                                |

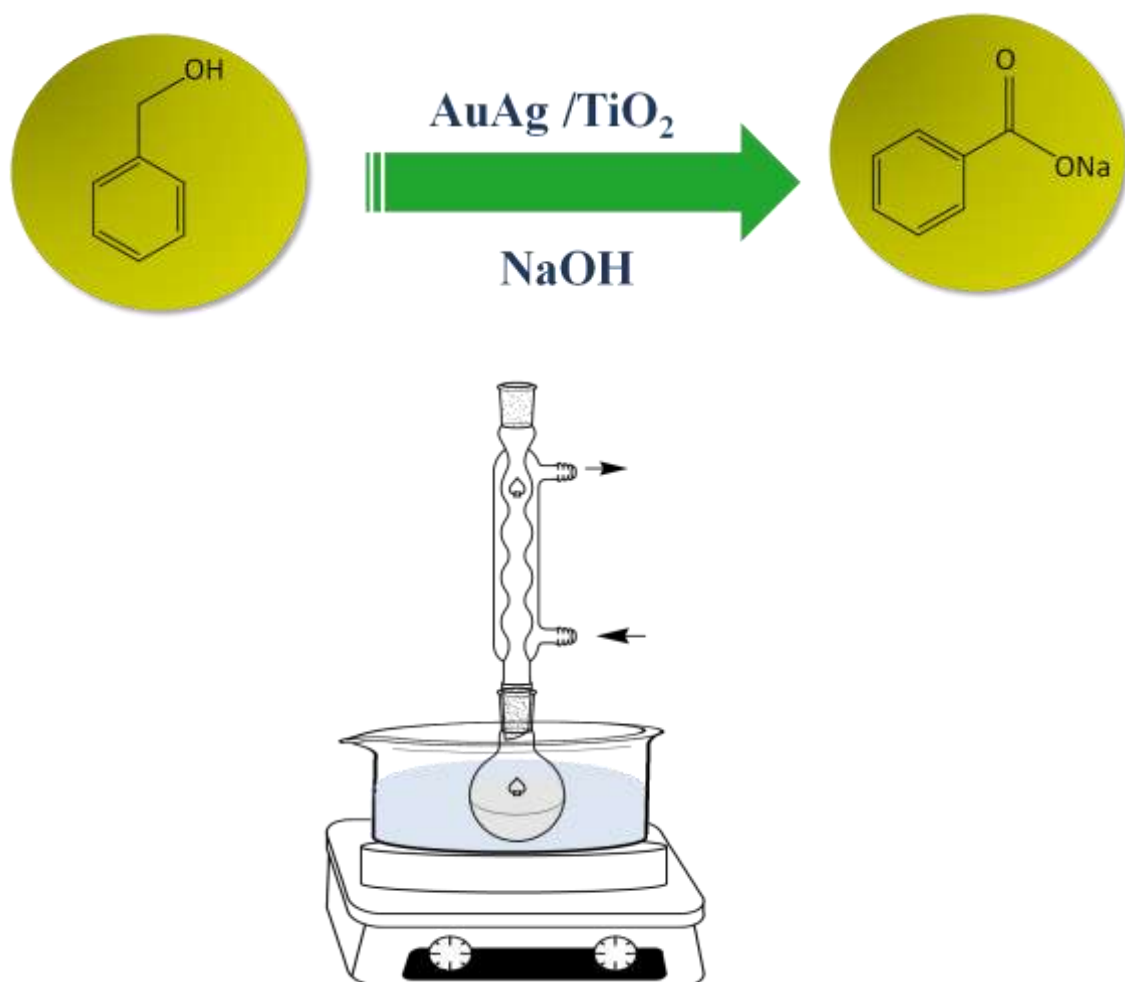

Scheme S1 Diagram of the reaction equipment.
